# Supplementary material
Source: PubMed Central journal article supplement (PMC4074517)
Supplement: NIHMS590043-supplement-VELO_Instrument.pdf [file NIHMS590043-supplement-VELO_Instrument.pdf]

# VELO

## VPI Effects on Life Outcome

### Parent Report for Children

#### DIRECTIONS

On the following pages is a list of things that might be a problem for **your child**. Please tell us **how much of a problem** each one has been for your child during the **past FOUR weeks** by circling:

- 0 if it is **Never** a problem
- 1 if it is **Almost Never** a problem
- 2 if it is **Sometimes** a problem
- 3 if it is **Often** a problem
- 4 if it is **Almost Always** a problem

There are no right or wrong answers.

If you do not understand a question, please ask for help from the Research Assistant.

Please try to answer all the questions.

Each Parent/caregiver should fill out a VELO questionnaire

#### Caregiver Information:

- 1) Parent/Caregiver Sex (circle):      Male      Female
  
- 2) If you had to pick **one** parent/caregiver as your child's **primary** caregiver, would **you** be the primary caregiver (circle)?  
Yes      No

In the past **four weeks**, how much of a **problem** has your child had with (circle one for each question):

|                                                                                        | Never | Almost Never | Sometimes | Often | Almost Always |
|----------------------------------------------------------------------------------------|-------|--------------|-----------|-------|---------------|
| <b>Speech Limitations (problems with...)</b>                                           |       |              |           |       |               |
| 1. Air comes out his or her nose when talking                                          | 0     | 1            | 2         | 3     | 4             |
| 2. Runs out of breath when talking                                                     | 0     | 1            | 2         | 3     | 4             |
| 3. Difficulty speaking in long sentences                                               | 0     | 1            | 2         | 3     | 4             |
| 4. Speech is too weak                                                                  | 0     | 1            | 2         | 3     | 4             |
| 5. Difficulty being understood when in a hurry                                         | 0     | 1            | 2         | 3     | 4             |
| 6. Speech gets worse toward the end of the day                                         | 0     | 1            | 2         | 3     | 4             |
| 7. Speech sounds different than other kids                                             | 0     | 1            | 2         | 3     | 4             |
| <b>Swallowing Problems (problems with...)</b>                                          |       |              |           |       |               |
| 8. Liquids come from the nose while drinking                                           | 0     | 1            | 2         | 3     | 4             |
| 9. Solid food comes from the nose while eating                                         | 0     | 1            | 2         | 3     | 4             |
| 10. Others make fun of my child when food or liquids escape through the nose           | 0     | 1            | 2         | 3     | 4             |
| <b>Situational Difficulty (problems with...)</b>                                       |       |              |           |       |               |
| 11. Speech is difficult for strangers to understand                                    | 0     | 1            | 2         | 3     | 4             |
| 12. Speech is difficult for friends to understand                                      | 0     | 1            | 2         | 3     | 4             |
| 13. Speech is difficult for family to understand                                       | 0     | 1            | 2         | 3     | 4             |
| 14. Difficulty being understood when not speaking face to face, eg, as in a car        | 0     | 1            | 2         | 3     | 4             |
| 15. Difficulty being understood on the phone                                           | 0     | 1            | 2         | 3     | 4             |
| <b>Emotional Impact (problems with...)</b>                                             |       |              |           |       |               |
| 16. Teased because of speech                                                           | 0     | 1            | 2         | 3     | 4             |
| 17. Child gets sad because of speech                                                   | 0     | 1            | 2         | 3     | 4             |
| 18. Gets frustrated or gives up when he or she is not understood                       | 0     | 1            | 2         | 3     | 4             |
| 19. Is shy or withdrawn because of speech                                              | 0     | 1            | 2         | 3     | 4             |
| <b>Perception by Others (problems with...)</b>                                         |       |              |           |       |               |
| 20. Treated as if he or she is not very bright because of speech                       | 0     | 1            | 2         | 3     | 4             |
| 21. Others ignore my child because of his or her speech                                | 0     | 1            | 2         | 3     | 4             |
| 22. Others do not like to talk on the phone with my child because of his or her speech | 0     | 1            | 2         | 3     | 4             |
| 23. Family or friends tend to speak for my child                                       | 0     | 1            | 2         | 3     | 4             |
| <b>Caregiver Impact (problems with...)</b>                                             |       |              |           |       |               |
| 24. I am worried or concerned about my child's speech                                  | 0     | 1            | 2         | 3     | 4             |
| 25. I find it difficult to understand my child                                         | 0     | 1            | 2         | 3     | 4             |
| 26. My child's speech problem slows me down or inconveniences me                       | 0     | 1            | 2         | 3     | 4             |

# VELO

## VPI Effects on Life Outcome

### Youth Report

#### DIRECTIONS

Please help your child to answer the questions on the following pages

On the following pages is a list of things that might be a problem for **you**. Please tell us **how much of a problem** each one has been for you during the **past FOUR weeks** by circling:

- 0 if it is **Never** a problem
- 1 if it is **Almost Never** a problem
- 2 if it is **Sometimes** a problem
- 3 if it is **Often** a problem
- 4 if it is **Almost Always** a problem

There are no right or wrong answers.

If you do not understand a question, please ask for help from your parent or the Research Assistant.

Please try to answer all the questions.

In the past **four weeks**, how much of a **problem** has this been for you (circle one answer for each question):

|                                                                                          | Never | Almost Never | Sometimes | Often | Almost Always |
|------------------------------------------------------------------------------------------|-------|--------------|-----------|-------|---------------|
| <b>Talking (problems with...)</b>                                                        |       |              |           |       |               |
| 1. Air comes out my nose when I talk                                                     | 0     | 1            | 2         | 3     | 4             |
| 2. I run out of breath when I talk                                                       | 0     | 1            | 2         | 3     | 4             |
| 3. It is hard talking in long sentences                                                  | 0     | 1            | 2         | 3     | 4             |
| 4. My speech is too weak                                                                 | 0     | 1            | 2         | 3     | 4             |
| 5. I have trouble being understood when I'm in a hurry                                   | 0     | 1            | 2         | 3     | 4             |
| 6. My speech gets worse toward the end of the day                                        | 0     | 1            | 2         | 3     | 4             |
| 7. My speech sounds different than other kids                                            | 0     | 1            | 2         | 3     | 4             |
| <b>Swallowing (problems with...)</b>                                                     |       |              |           |       |               |
| 8. Liquids come out my nose while drinking                                               | 0     | 1            | 2         | 3     | 4             |
| 9. Food comes out my nose while eating                                                   | 0     | 1            | 2         | 3     | 4             |
| 10. Others make fun of me when food or liquids come out my nose                          | 0     | 1            | 2         | 3     | 4             |
| <b>Times when I have trouble (problems with...)</b>                                      |       |              |           |       |               |
| 11. My speech is hard for strangers to understand                                        | 0     | 1            | 2         | 3     | 4             |
| 12. My speech is hard for friends to understand                                          | 0     | 1            | 2         | 3     | 4             |
| 13. My speech is hard for family to understand                                           | 0     | 1            | 2         | 3     | 4             |
| 14. I have trouble being understood when others can't see my face, for example, in a car | 0     | 1            | 2         | 3     | 4             |
| 15. I have trouble being understood on the phone                                         | 0     | 1            | 2         | 3     | 4             |
| <b>How I feel (problems with...)</b>                                                     |       |              |           |       |               |
| 16. I am teased because of how I talk                                                    | 0     | 1            | 2         | 3     | 4             |
| 17. I get sad because of how I talk                                                      | 0     | 1            | 2         | 3     | 4             |
| 18. I get frustrated or give up when I am not understood                                 | 0     | 1            | 2         | 3     | 4             |
| 19. I am shy because of how I talk                                                       | 0     | 1            | 2         | 3     | 4             |
| <b>How others feel about me (problems with...)</b>                                       |       |              |           |       |               |
| 20. I am treated like I am not smart because of how I talk                               | 0     | 1            | 2         | 3     | 4             |
| 21. Others ignore me because of how I talk                                               | 0     | 1            | 2         | 3     | 4             |
| 22. Others do not like to talk on the phone with me because of how I talk                | 0     | 1            | 2         | 3     | 4             |
| 23. My family or friends tend to talk for me                                             | 0     | 1            | 2         | 3     | 4             |
